# Supplementary material for: How to capture C2O2: structures and bonding of neutral and charged complexes [(NHC)–C2O2–(NHC)]q(NHC = N-heterocyclic carbene;q= 0, 1+, 2+)
Source: Royal Society of Chemistry journal article supplement (doi:10.1039/d2cp02598a), 2022-01-01
Supplement: d2cp02598a1.pdf [file d2cp02598a1.pdf]

Supplementary Information

**How to capture C<sub>2</sub>O<sub>2</sub>: Structures and bonding of neutral and charged complexes [(NHC)-C<sub>2</sub>O<sub>2</sub>-(NHC)]<sup>q</sup> (NHC = N-heterocyclic carbene; q = 0, 1+, 2+)**

Chengxiang Ding<sup>a</sup>, Lei Yao<sup>a</sup>, Lili Zhao<sup>a,\*</sup>, Gernot Frenking<sup>a, b,c\*</sup>

<sup>a</sup>Institute of Advanced Synthesis, School of Chemistry and Molecular Engineering, Nanjing Tech University, Nanjing 211816, China. Email: [ias\\_llzhao@njtech.edu.cn](mailto:ias_llzhao@njtech.edu.cn)

<sup>b</sup>Fachbereich Chemie, Philipps-Universität Marburg, Hans-Meerwein-Strasse 4, D-35043 Marburg, Germany.

<sup>c</sup>Donostia International Physics Center (DIPC), P.K. 1072, 20080 Donostia, Euskadi, Spain.  
Email: [frenking@chemie.uni-marburg.de](mailto:frenking@chemie.uni-marburg.de)

**Table of Contents**

|                        |           |
|------------------------|-----------|
| <i>Figure S1</i> ..... | <i>S1</i> |
| <i>Figure S2</i> ..... | <i>S2</i> |
| <i>Figure S3</i> ..... | <i>S3</i> |
| <i>Figure S4</i> ..... | <i>S4</i> |
| <i>Figure S5</i> ..... | <i>S5</i> |
| <i>Table S1</i> .....  | <i>S6</i> |
| <i>Table S2</i> .....  | <i>S7</i> |

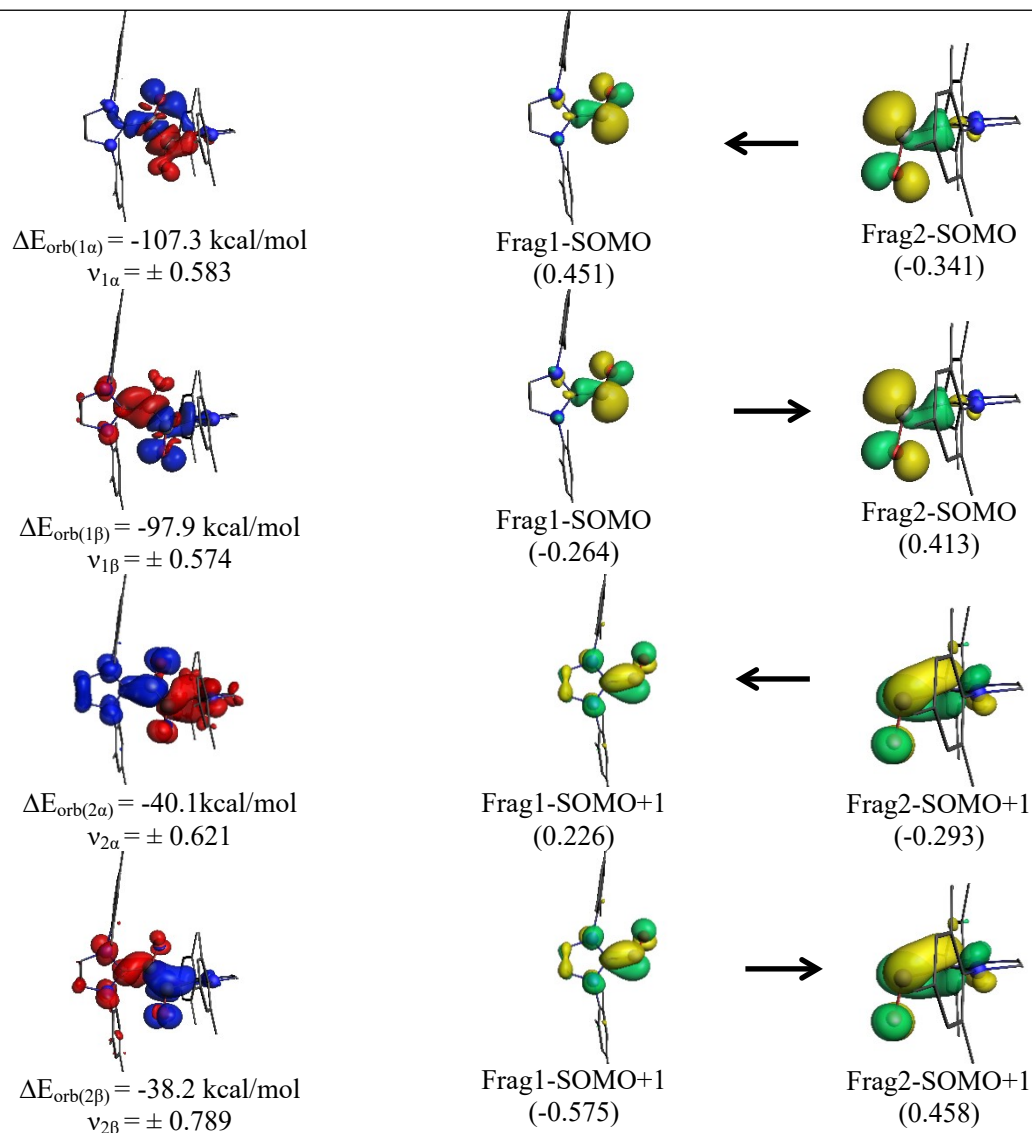

**Figure S1.** Plot of the deformation densities  $\Delta\rho$  of the pairwise orbital interactions of the  $\alpha$  and  $\beta$  electrons and the associated most important interacting MOs of the two fragments [NHC-CO](T) in [NHC-C<sub>2</sub>O<sub>2</sub>-NHC] (**1**). The direction of the charge flow is red→blue. The eigenvalues  $v$  give the amount of charge flow.

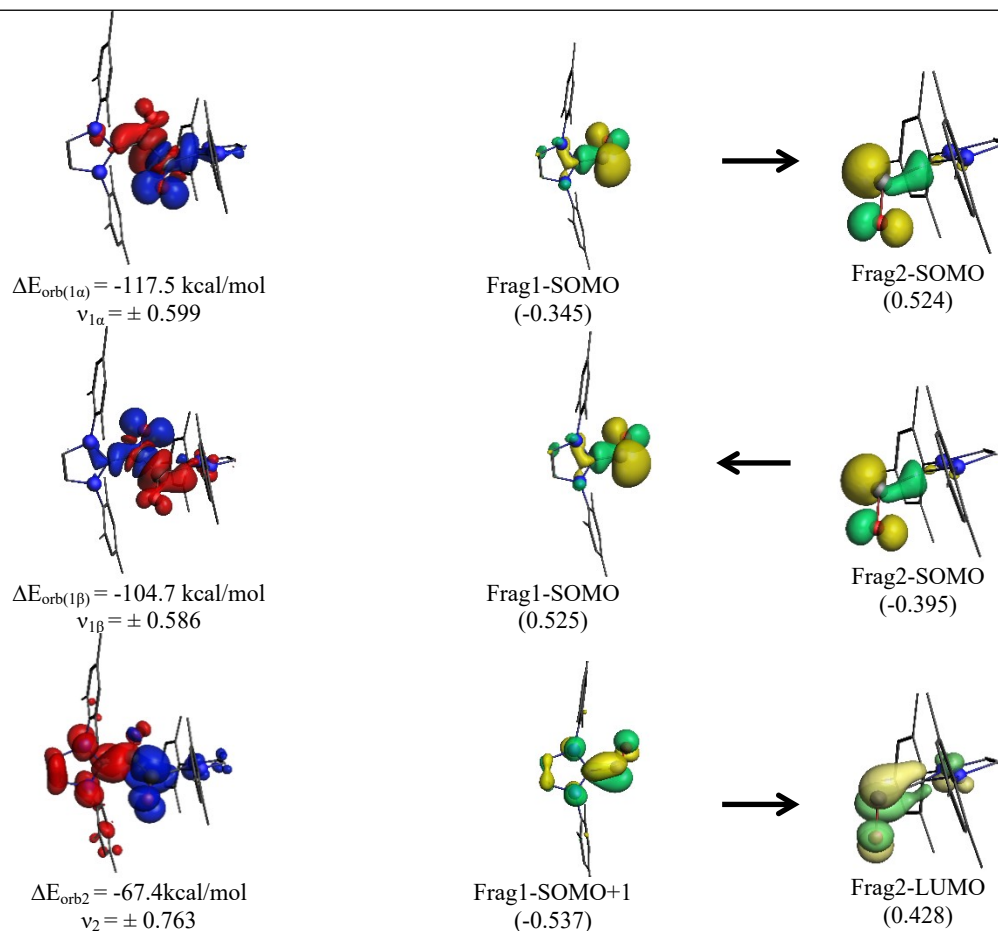

**Figure S2.** Plot of the deformation densities  $\Delta\rho$  of the pairwise orbital interactions of the  $\alpha$  and  $\beta$  electrons and the associated most important interacting MOs of the two fragments [NHC-CO]<sup>+</sup> (D) and [NHC-CO] (T) in [NHC-C<sub>2</sub>O<sub>2</sub>-NHC]<sup>+</sup> (**1**<sup>+</sup>). The direction of the charge flow is red→blue. The eigenvalues  $v$  give the amount of charge flow.

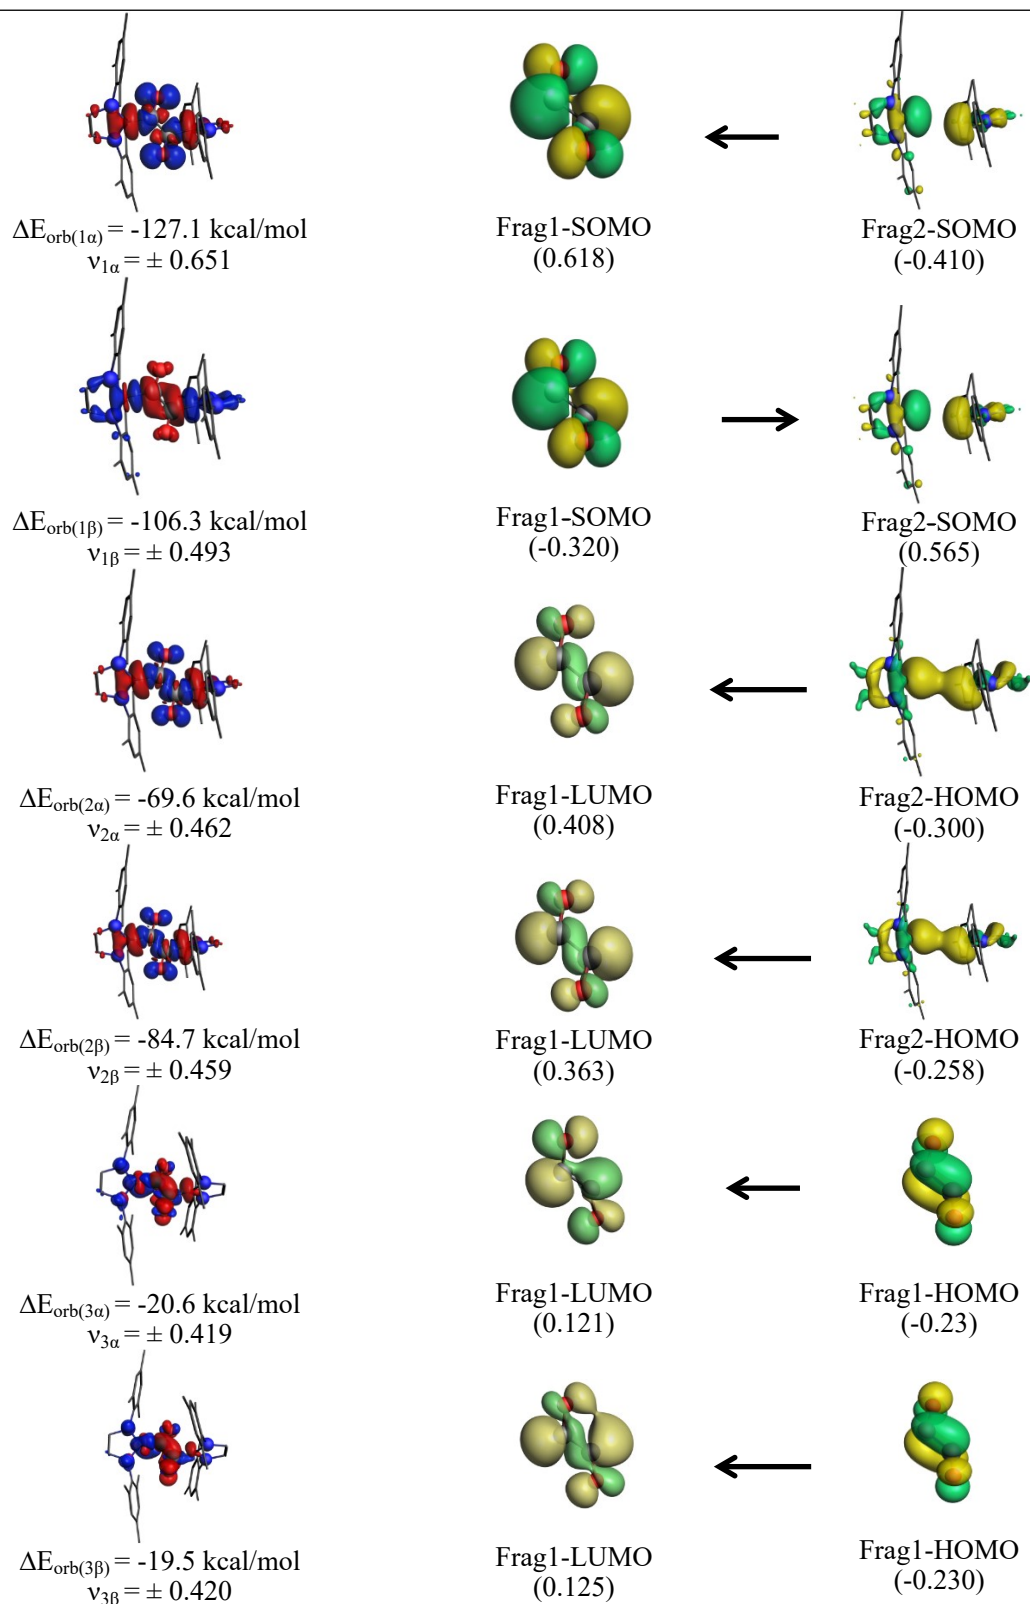

**Figure S3.** Plot of deformation densities  $\Delta\rho$  of the pairwise orbital interactions of the  $\alpha$  and  $\beta$  electrons and the associated most important interacting MOs of the two fragments  $[\text{C}_2\text{O}_2]^-$  (D) and  $[\text{2NHC}]^+$  (D) in  $[\text{NHC-C}_2\text{O}_2\text{-NHC}]$  (**1**). The direction of the charge flow is red→blue. The eigenvalues  $v$  give the amount of charge flow.

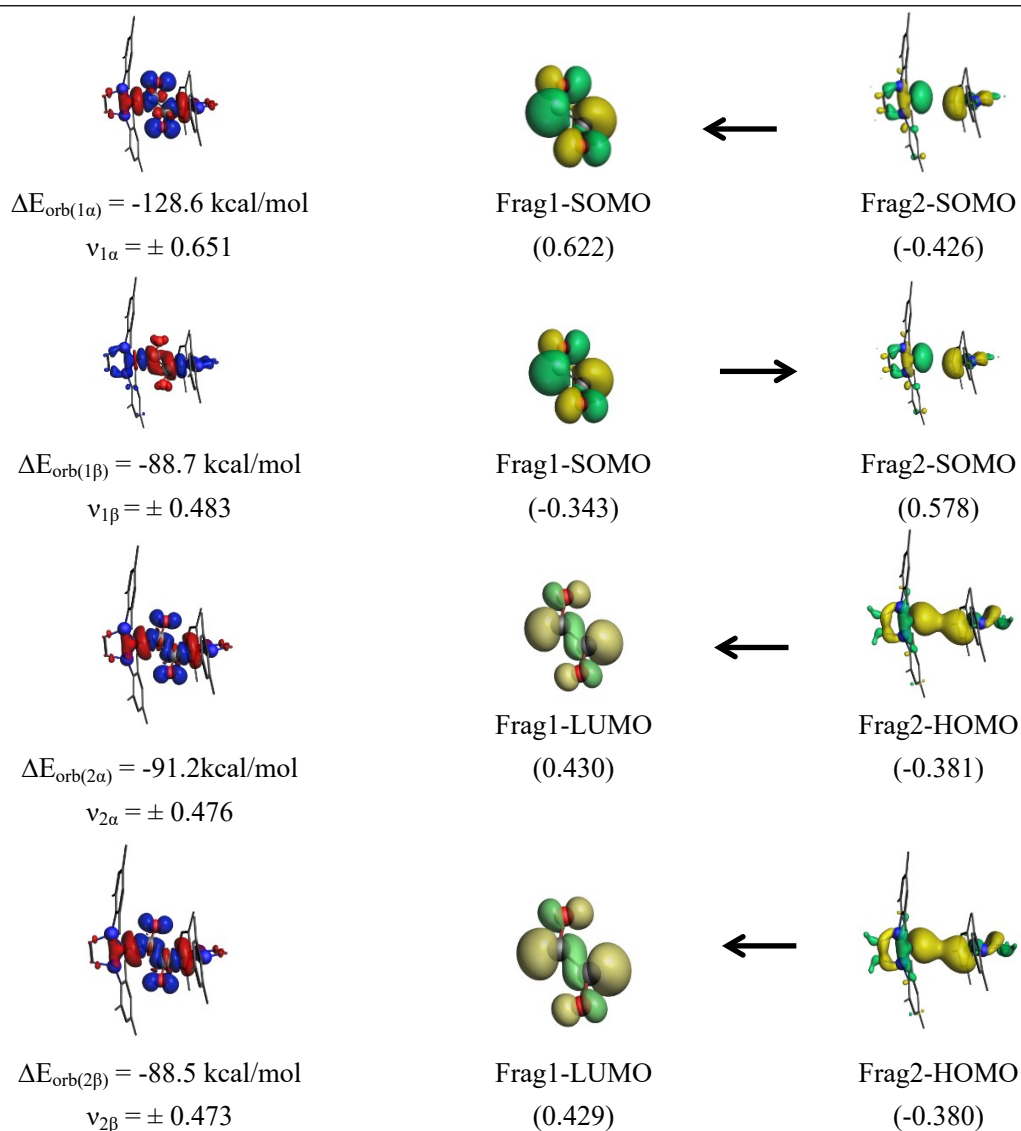

**Figure S4.** Plot of deformation densities  $\Delta\rho$  of the pairwise orbital interactions of the  $\alpha$  and  $\beta$  electrons and the associated interaction energies ( $\Delta E_{\text{orb}}$ ) between fragments, as well as the shape of the two fragments  $[\text{C}_2\text{O}_2]^0$  (T) and  $[\text{2NHC}]^+$  (D) in  $[\text{NHC-C}_2\text{O}_2\text{-NHC}]^+$  ( $\mathbf{1}^+$ ). The direction of the charge flow is red→blue. The eigenvalues  $v$  give the amount of charge flow.

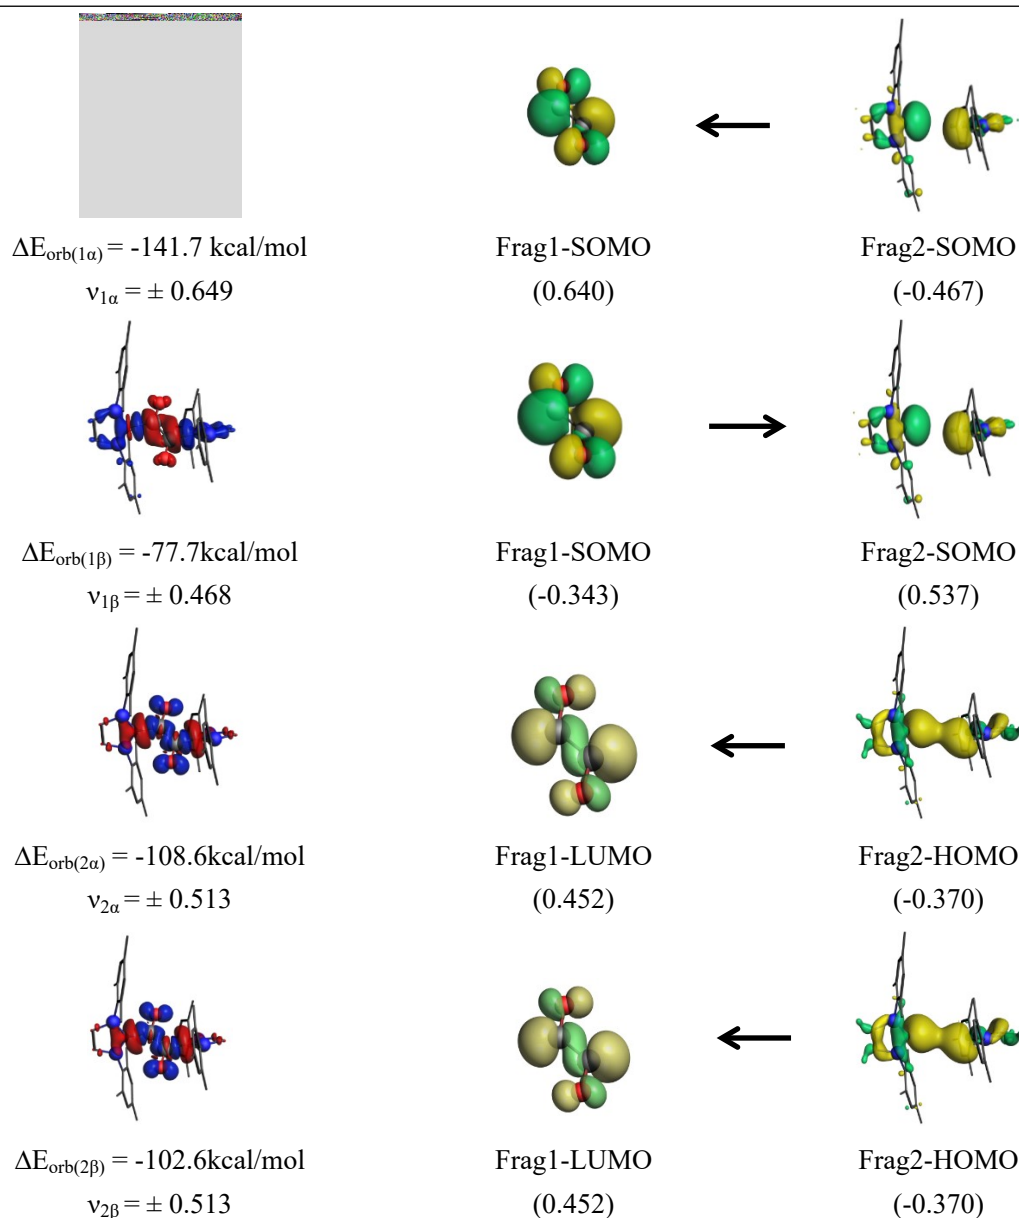

**Figure S5.** Plot of deformation densities  $\Delta\rho$  of the pairwise orbital interactions of the  $\alpha$  and  $\beta$  electrons and the associated interaction energies ( $\Delta E_{\text{orb}}$ ) between fragments, as well as the shape of the most important interacting MOs of the two fragments  $[\text{C}_2\text{O}_2]^+$  (D) and  $[\text{2NHC}]^+$  (D) in  $[\text{NHC-C}_2\text{O}_2\text{-NHC}]^{2+}$  ( $\mathbf{1}^{2+}$ ). The direction of the charge flow is red $\rightarrow$ blue. The eigenvalues  $v$  give the amount of charge flow.

**Table S1.** EDA-NOCV results of 1, 1<sup>+</sup> and 1<sup>2+</sup> at the BP86+D3(BJ)/TZ2P//BP86-D3(BJ)/def2-TZVPP level of theory using fragments in the electronic singlet (S) or doublet (D) state. Energy values are given in kcal·mol<sup>-1</sup>.

|                                         | <b>1</b>                                                          | <b>1<sup>+</sup></b>                                                           | <b>1<sup>2+</sup></b>                                                           |
|-----------------------------------------|-------------------------------------------------------------------|--------------------------------------------------------------------------------|---------------------------------------------------------------------------------|
| Fragments                               | [C <sub>2</sub> O <sub>2</sub> ] (S)<br>+ [NHC <sub>2</sub> ] (S) | [C <sub>2</sub> O <sub>2</sub> ] <sup>+</sup> (D)<br>+ [NHC <sub>2</sub> ] (S) | [C <sub>2</sub> O <sub>2</sub> ] <sup>2+</sup> (S)<br>+ [NHC <sub>2</sub> ] (S) |
| $\Delta E_{\text{int}}$                 | -207.6                                                            | -316.1                                                                         | -529.9                                                                          |
| $\Delta E_{\text{Pauli}}$               | 862.6                                                             | 782.1                                                                          | 791.2                                                                           |
| $\Delta E_{\text{disp}}^{\text{[a]}}$   | -22.7(2.1%)                                                       | -21.7(2.0%)                                                                    | -21.6(1.6%)                                                                     |
| $\Delta E_{\text{elstat}}^{\text{[a]}}$ | -436.2 (40.8%)                                                    | -430.9(39.2%)                                                                  | -475.3(36.0%)                                                                   |
| $\Delta E_{\text{orb}}^{\text{[a]}}$    | -611.1(57.1%)                                                     | -645.7(58.8%)                                                                  | -824.2(62.4%)                                                                   |
| $\Delta E_{\text{orb1}}^{\text{[b]}}$   | -293.3(48.0%)                                                     | -307.8(47.6%)                                                                  | -342.6(41.6%)                                                                   |
| $\Delta E_{\text{orb2}}^{\text{[b]}}$   | -189.9(31.0%)                                                     | -206.4(32.0%)                                                                  | -249.1(30.2%)                                                                   |
| $\Delta E_{\text{rest}}$                | - 127.9(20.9%)                                                    | -131.5(20.4%)                                                                  | -232.5(28.2%)                                                                   |

<sup>a</sup>The values in parentheses give the percentage contribution to the total attractive interactions  $\Delta E_{\text{elstat}} + \Delta E_{\text{orb}} + \Delta E_{\text{disp}}$ .

<sup>b</sup>The values in parentheses give the percentage contribution to the total orbital interactions  $\Delta E_{\text{orb}}$ .

**Table S2.** Coordinates and energies (a.u) of the structures optimized at the BP86-D3(BJ)/def2-TZVPP level by the Gaussian 16 software.

| <b>1 (NHC-C<sub>2</sub>O<sub>2</sub>-NHC)<sup>0</sup> (S)</b> |          |          |          |   |          |          |          |
|---------------------------------------------------------------|----------|----------|----------|---|----------|----------|----------|
| E = -2076.024080                                              |          |          |          | C | -3.05776 | 1.859147 | -0.55932 |
|                                                               |          |          |          | C | 1.19607  | 0.515661 | -3.96046 |
| O                                                             | -0.3077  | -0.77049 | -1.53479 | C | -0.48227 | 3.693675 | -1.6573  |
| N                                                             | 0.726567 | -2.04849 | 1.67166  | C | 3.225029 | 2.298773 | 0.327627 |
| N                                                             | -1.06348 | -2.68806 | 0.57129  | C | 5.937793 | -0.71762 | -2.67872 |
| C                                                             | 2.247625 | -0.77718 | 3.10377  | C | -4.44539 | 2.40756  | 1.38355  |
| C                                                             | 2.019853 | -1.47305 | 1.905489 | C | -4.26906 | 1.786861 | 0.142202 |
| C                                                             | -0.01047 | -0.58991 | -0.26718 | C | -2.849   | 1.119767 | -1.84942 |
| C                                                             | -0.10052 | -1.70822 | 0.633383 | C | -3.37983 | 3.132741 | 1.934203 |
| C                                                             | 3.540656 | -0.28866 | 3.333076 | C | -0.98552 | 3.976676 | 1.88064  |
| C                                                             | 4.300669 | -1.18092 | 1.231968 | C | -5.74324 | 2.259138 | 2.136699 |
| C                                                             | 3.024433 | -1.67393 | 0.942962 | H | 3.735616 | 0.262694 | 4.256038 |
| C                                                             | 4.576154 | -0.47902 | 2.412913 | H | 5.101606 | -1.35681 | 0.511587 |
| C                                                             | 0.263692 | -3.22135 | 2.272152 | H | 0.799216 | -3.68199 | 3.092038 |
| C                                                             | -2.32099 | -2.50608 | -0.10492 | H | 0.321164 | -0.00441 | 3.560386 |
| C                                                             | -2.5137  | -3.07021 | -1.37454 | H | 1.483322 | 0.079774 | 4.921115 |
| C                                                             | -3.30608 | -1.75219 | 0.549627 | H | 0.724074 | -1.46943 | 4.494436 |
| C                                                             | 1.133112 | -0.53441 | 4.08183  | H | -1.51762 | -4.45122 | 1.739344 |
| C                                                             | -0.85057 | -3.61107 | 1.594067 | H | 2.174042 | -3.31014 | -0.19965 |
| C                                                             | 2.755339 | -2.38898 | -0.35331 | H | 3.698877 | -2.65443 | -0.84648 |
| C                                                             | 5.951571 | 0.085614 | 2.661434 | H | 2.174344 | -1.75572 | -1.04128 |
| C                                                             | -4.80198 | -2.20471 | -1.33274 | H | 6.088725 | 1.039847 | 2.125983 |
| C                                                             | -4.55288 | -1.63561 | -0.08006 | H | 6.737031 | -0.59794 | 2.308692 |
| C                                                             | -3.02112 | -1.05878 | 1.855341 | H | 6.12026  | 0.283114 | 3.728489 |
| C                                                             | -3.76841 | -2.90769 | -1.96915 | H | -5.34355 | -1.07586 | 0.423685 |
| C                                                             | -1.37618 | -3.74559 | -2.08414 | H | -2.62043 | -1.75113 | 2.610982 |
| C                                                             | -6.14509 | -2.04722 | -2.0006  | H | -3.93252 | -0.59857 | 2.255072 |
| O                                                             | 0.38888  | 1.038323 | 1.545704 | H | -2.2718  | -0.26272 | 1.719666 |
| N                                                             | 1.094405 | 2.139834 | -1.59791 | H | -3.93845 | -3.33365 | -2.96101 |
| N                                                             | -0.79197 | 2.736197 | -0.69793 | H | -0.5907  | -2.98929 | -2.25368 |
| C                                                             | 2.377886 | 0.641324 | -3.03873 | H | -1.70227 | -4.16185 | -3.04563 |
| C                                                             | 2.305309 | 1.408434 | -1.86545 | H | -0.93765 | -4.55639 | -1.484   |
| C                                                             | 0.242409 | 0.673315 | 0.317078 | H | -6.84919 | -1.50173 | -1.3584  |
| C                                                             | 0.172362 | 1.780634 | -0.67196 | H | -6.59138 | -3.02419 | -2.23967 |
| C                                                             | 3.580641 | -0.03211 | -3.28732 | H | -6.05453 | -1.49452 | -2.94847 |
| C                                                             | 4.543905 | 0.83134  | -1.2555  | H | 3.65983  | -0.64554 | -4.18779 |
| C                                                             | 3.360995 | 1.51134  | -0.94594 | H | 5.385791 | 0.910453 | -0.56538 |
| C                                                             | 4.669347 | 0.051483 | -2.41158 | H | 1.31277  | 3.786208 | -2.9857  |
| C                                                             | 0.70454  | 3.322709 | -2.22001 | H | 0.338441 | 0.133611 | -3.38243 |
| C                                                             | -2.03562 | 2.627993 | 0.021325 | H | 1.41999  | -0.18027 | -4.77859 |
| C                                                             | -2.15448 | 3.255712 | 1.268888 | H | 0.914372 | 1.48233  | -4.40606 |



|                                                                           |          |          |          |   |          |          |          |
|---------------------------------------------------------------------------|----------|----------|----------|---|----------|----------|----------|
| H                                                                         | -1.13595 | 4.534901 | -1.84812 | C | -1.36532 | 3.659111 | 2.406335 |
| H                                                                         | 2.864411 | 3.320854 | 0.135839 | C | -6.09914 | 1.880054 | 2.21255  |
| H                                                                         | 4.191621 | 2.365236 | 0.841514 | O | 0.072599 | -0.67838 | -1.65321 |
| H                                                                         | 2.498724 | 1.825972 | 1.010746 | N | 1.00247  | -2.39015 | 1.209456 |
| H                                                                         | 5.925311 | -1.6866  | -2.15297 | N | -0.95123 | -2.77462 | 0.327834 |
| H                                                                         | 6.822504 | -0.16919 | -2.32657 | C | 2.468273 | -1.24134 | 2.79707  |
| H                                                                         | 6.064531 | -0.92884 | -3.74893 | C | 2.276614 | -1.78161 | 1.513454 |
| H                                                                         | -5.08761 | 1.212566 | -0.29461 | C | 0.097918 | -0.60639 | -0.39351 |
| H                                                                         | -2.56197 | 1.801406 | -2.66557 | C | 0.056446 | -1.87332 | 0.393505 |
| H                                                                         | -3.76687 | 0.596427 | -2.14288 | C | 3.727387 | -0.70231 | 3.078095 |
| H                                                                         | -2.03275 | 0.370591 | -1.76167 | C | 4.526169 | -1.28135 | 0.881744 |
| H                                                                         | -3.49814 | 3.608964 | 2.910259 | C | 3.278982 | -1.81117 | 0.532209 |
| H                                                                         | -0.1636  | 3.256485 | 2.028451 | C | 4.767745 | -0.71679 | 2.138302 |
| H                                                                         | -1.2607  | 4.414962 | 2.847981 | C | 0.588147 | -3.63672 | 1.664219 |
| H                                                                         | -0.61423 | 4.783911 | 1.231289 | C | -2.21466 | -2.55055 | -0.33775 |
| H                                                                         | -6.57499 | 2.022579 | 1.459577 | C | -2.37283 | -3.00372 | -1.65617 |
| H                                                                         | -5.99696 | 3.174659 | 2.688873 | C | -3.22203 | -1.88745 | 0.379673 |
| H                                                                         | -5.6764  | 1.443486 | 2.875015 | C | 1.368148 | -1.23424 | 3.823776 |
|                                                                           |          |          |          | C | -0.64004 | -3.87421 | 1.115877 |
|                                                                           |          |          |          | C | 3.039536 | -2.37376 | -0.84273 |
| <b>1<sup>+</sup> [NHC-C<sub>2</sub>O<sub>2</sub>-NHC]<sup>+</sup> (D)</b> |          |          |          | C | 6.108015 | -0.11424 | 2.466829 |
| <b>E = -2075.866728</b>                                                   |          |          |          | C | -4.66853 | -2.1572  | -1.57778 |
| O                                                                         | -0.09317 | 0.653806 | 1.640188 | C | -4.45221 | -1.71886 | -0.26601 |
| N                                                                         | 0.917507 | 2.403037 | -1.21147 | C | -2.99032 | -1.36192 | 1.770875 |
| N                                                                         | -1.03302 | 2.764706 | -0.31013 | C | -3.61608 | -2.78575 | -2.25844 |
| C                                                                         | 2.413018 | 1.305209 | -2.80803 | C | -1.24014 | -3.66069 | -2.39585 |
| C                                                                         | 2.202263 | 1.818632 | -1.51618 | C | -6.00906 | -1.97448 | -2.23987 |
| C                                                                         | 0.034732 | 0.602732 | 0.383012 | H | 3.867237 | 0.369677 | -4.07882 |
| C                                                                         | -0.01711 | 1.871952 | -0.38943 | H | 5.248077 | 1.361302 | -0.12789 |
| C                                                                         | 3.680243 | 0.785356 | -3.08645 | H | 1.101084 | 4.256277 | -2.30645 |
| C                                                                         | 4.451442 | 1.331883 | -0.87239 | H | 0.412181 | 0.841279 | -3.44298 |
| C                                                                         | 3.194371 | 1.840081 | -0.5249  | H | 1.638943 | 0.739194 | -4.73047 |
| C                                                                         | 4.711646 | 0.79382  | -2.13625 | H | 1.071829 | 2.323179 | -4.17646 |
| C                                                                         | 0.487255 | 3.648008 | -1.65483 | H | -1.42971 | 4.699327 | -1.18228 |
| C                                                                         | -2.29685 | 2.518586 | 0.346469 | H | 2.358263 | 3.307495 | 0.84265  |
| C                                                                         | -2.47885 | 2.979202 | 1.658863 | H | 3.88453  | 2.568809 | 1.374528 |
| C                                                                         | -3.28087 | 1.825435 | -0.37419 | H | 2.371524 | 1.649184 | 1.465078 |
| C                                                                         | 1.323288 | 1.304092 | -3.84551 | H | 6.014753 | -0.8778  | -2.54976 |
| C                                                                         | -0.7386  | 3.870668 | -1.09491 | H | 6.804995 | 0.46609  | -1.69653 |
| C                                                                         | 2.937058 | 2.373034 | 0.858933 | H | 6.434342 | 0.594491 | -3.4314  |
| C                                                                         | 6.063763 | 0.219487 | -2.46721 | H | -5.30569 | 1.120489 | -0.28675 |
| C                                                                         | -4.75515 | 2.083684 | 1.56364  | H | -2.65255 | 2.066541 | -2.43852 |
| C                                                                         | -4.51449 | 1.636237 | 0.259206 | H | -3.9358  | 0.863234 | -2.18175 |
| C                                                                         | -3.01966 | 1.286415 | -1.75528 | H | -2.26062 | 0.488796 | -1.73985 |
| C                                                                         | -3.72378 | 2.741127 | 2.249454 |   |          |          |          |

|                                                                  |          |          |          |   |          |          |          |
|------------------------------------------------------------------|----------|----------|----------|---|----------|----------|----------|
| H                                                                | -3.89108 | 3.080842 | 3.273636 | C | 4.569878 | 0.279147 | 2.504274 |
| H                                                                | -0.52531 | 2.960383 | 2.538511 | C | 0.452127 | -2.74183 | 2.899953 |
| H                                                                | -1.70513 | 3.98924  | 3.394774 | C | -2.15775 | -2.67701 | 0.39019  |
| H                                                                | -0.98605 | 4.539715 | 1.867148 | C | -2.18537 | -3.57016 | -0.69179 |
| H                                                                | -6.66642 | 1.078029 | 1.722465 | C | -3.23466 | -1.85094 | 0.750867 |
| H                                                                | -6.70532 | 2.797079 | 2.149828 | C | 1.130517 | 0.17323  | 4.185951 |
| H                                                                | -5.9973  | 1.632584 | 3.277958 | C | -0.71397 | -3.24458 | 2.374487 |
| H                                                                | 3.900507 | -0.2673  | 4.064641 | C | 3.045437 | -2.31932 | 0.152223 |
| H                                                                | 5.330307 | -1.31496 | 0.145263 | C | 5.89068  | 0.966064 | 2.711288 |
| H                                                                | 1.21236  | -4.23404 | 2.316155 | C | -4.48168 | -2.82832 | -1.12046 |
| H                                                                | 0.455577 | -0.78806 | 3.405543 | C | -4.39212 | -1.95204 | -0.02939 |
| H                                                                | 1.669737 | -0.6527  | 4.70284  | C | -3.16166 | -0.90356 | 1.920084 |
| H                                                                | 1.123884 | -2.25077 | 4.167832 | C | -3.36844 | -3.62154 | -1.4362  |
| H                                                                | -1.32185 | -4.70955 | 1.21209  | C | -0.99621 | -4.42271 | -1.03881 |
| H                                                                | 2.486395 | -3.32335 | -0.81104 | C | -5.75152 | -2.9388  | -1.91891 |
| H                                                                | 3.993102 | -2.55258 | -1.35314 | O | -0.15735 | 1.140528 | 1.293747 |
| H                                                                | 2.453939 | -1.67626 | -1.46084 | N | 0.894633 | 1.755662 | -2.03949 |
| H                                                                | 6.068582 | 0.985312 | 2.404515 | N | -0.949   | 2.582355 | -1.18752 |
| H                                                                | 6.885039 | -0.45886 | 1.772675 | C | 2.256375 | 0.101178 | -3.22443 |
| H                                                                | 6.422901 | -0.36439 | 3.488962 | C | 2.135194 | 1.022824 | -2.16559 |
| H                                                                | -5.25997 | -1.22513 | 0.275933 | C | 0.079921 | 0.749328 | 0.162962 |
| H                                                                | -2.66719 | -2.15663 | 2.459945 | C | 0.039121 | 1.6703   | -0.99665 |
| H                                                                | -3.90885 | -0.91791 | 2.170303 | C | 3.483303 | -0.55312 | -3.35311 |
| H                                                                | -2.20874 | -0.58634 | 1.785752 | C | 4.396737 | 0.660717 | -1.48309 |
| H                                                                | -3.76518 | -3.11985 | -3.28726 | C | 3.180753 | 1.322976 | -1.27407 |
| H                                                                | -0.40821 | -2.95004 | -2.51467 | C | 4.569878 | -0.27913 | -2.50428 |
| H                                                                | -1.56451 | -3.98956 | -3.38988 | C | 0.452127 | 2.741837 | -2.89995 |
| H                                                                | -0.85481 | -4.53942 | -1.85776 | C | -2.15775 | 2.677009 | -0.39019 |
| H                                                                | -6.59692 | -1.18719 | -1.7501  | C | -2.18537 | 3.570146 | 0.691801 |
| H                                                                | -6.59824 | -2.90331 | -2.19017 | C | -3.23466 | 1.850947 | -0.75088 |
| H                                                                | -5.90068 | -1.71734 | -3.30233 | C | 1.130537 | -0.17319 | -4.186   |
|                                                                  |          |          |          | C | -0.71398 | 3.244585 | -2.37449 |
| <b>12+ [NHC-C<sub>2</sub>O<sub>2</sub>-NHC]<sup>2+</sup> (S)</b> |          |          |          | C | 3.045407 | 2.319278 | -0.1522  |
| <b>E = -2075.553777</b>                                          |          |          |          | C | 5.890668 | -0.96608 | -2.71128 |
| O                                                                | -0.15739 | -1.14052 | -1.29374 | C | -4.48168 | 2.828306 | 1.120463 |
| N                                                                | 0.894643 | -1.75566 | 2.039478 | C | -4.39212 | 1.952035 | 0.029381 |
| N                                                                | -0.949   | -2.58235 | 1.187518 | C | -3.16166 | 0.903587 | -1.9201  |
| C                                                                | 2.256369 | -0.10116 | 3.224406 | C | -3.36843 | 3.621517 | 1.436217 |
| C                                                                | 2.135208 | -1.02283 | 2.165588 | C | -0.99621 | 4.422694 | 1.038831 |
| C                                                                | 0.079913 | -0.74932 | -0.16296 | C | -5.75152 | 2.938767 | 1.918919 |
| C                                                                | 0.039115 | -1.67028 | 0.996655 | H | 3.600975 | 1.288161 | 4.151714 |
| C                                                                | 3.483293 | 0.553155 | 3.353081 | H | 5.237706 | -0.9055  | 0.833619 |
| C                                                                | 4.396755 | -0.66073 | 1.483095 | H | 1.016192 | -3.01721 | 3.782633 |
| C                                                                | 3.180779 | -1.323   | 1.274083 | H | 0.15913  | 0.223628 | 3.678113 |

|   |          |          |          |                         |          |          |          |
|---|----------|----------|----------|-------------------------|----------|----------|----------|
| H | 1.29519  | 1.125599 | 4.702938 | <b>NHC-CO (S)</b>       |          |          |          |
| H | 1.06648  | -0.60516 | 4.961739 | <b>E = -1037.938161</b> |          |          |          |
| H | -1.39305 | -4.00641 | 2.738863 | O                       | -0.19666 | -1.14276 | 2.1426   |
| H | 2.366522 | -3.14697 | 0.397854 | N                       | -1.08568 | 0.470808 | -0.72655 |
| H | 4.023719 | -2.75195 | -0.08773 | N                       | 1.109771 | 0.447743 | -0.76119 |
| H | 2.676521 | -1.83995 | -0.76843 | C                       | -3.2747  | 1.214532 | 0.073588 |
| H | 5.761922 | 2.050374 | 2.836314 | C                       | -2.42446 | 0.17298  | -0.3426  |
| H | 6.577439 | 0.788947 | 1.874652 | C                       | 0.027141 | -0.19413 | 1.442439 |
| H | 6.379092 | 0.59747  | 3.626208 | C                       | 0.018584 | -0.06373 | -0.07677 |
| H | -5.25164 | -1.33168 | 0.23107  | C                       | -4.58669 | 0.886204 | 0.439326 |
| H | -2.97021 | -1.43386 | 2.865035 | C                       | -4.16234 | -1.44517 | 0.04703  |
| H | -4.10569 | -0.3597  | 2.030382 | C                       | -2.84767 | -1.17253 | -0.33894 |
| H | -2.36591 | -0.15223 | 1.801968 | C                       | -5.05232 | -0.43168 | 0.428601 |
| H | -3.42185 | -4.3056  | -2.28517 | C                       | -0.67051 | 1.380022 | -1.71245 |
| H | -0.13622 | -3.79809 | -1.325   | C                       | 2.452085 | 0.177917 | -0.36259 |
| H | -1.22631 | -5.08589 | -1.87992 | C                       | 2.973107 | -1.11537 | -0.54679 |
| H | -0.68285 | -5.05287 | -0.19337 | C                       | 3.193465 | 1.196381 | 0.264193 |
| H | -6.39016 | -2.05582 | -1.7911  | C                       | -2.79619 | 2.641062 | 0.172865 |
| H | -6.33362 | -3.81488 | -1.5935  | C                       | 0.686033 | 1.359692 | -1.73513 |
| H | -5.54401 | -3.07051 | -2.98905 | C                       | -1.91694 | -2.2909  | -0.72641 |
| H | 3.601002 | -1.2881  | -4.15177 | C                       | -6.47044 | -0.76105 | 0.819544 |
| H | 5.237682 | 0.905487 | -0.8336  | C                       | 5.070426 | -0.36112 | 0.464478 |
| H | 1.016191 | 3.017228 | -3.78263 | C                       | 4.50442  | 0.905078 | 0.657224 |
| H | 0.159149 | -0.22365 | -3.67817 | C                       | 2.577909 | 2.542896 | 0.545256 |
| H | 1.295242 | -1.12553 | -4.70304 | C                       | 4.285563 | -1.35866 | -0.12779 |
| H | 1.06648  | 0.60524  | -4.96175 | C                       | 2.13994  | -2.20753 | -1.16246 |
| H | -1.39305 | 4.006413 | -2.73886 | C                       | 6.493733 | -0.6413  | 0.874639 |
| H | 2.36649  | 3.146935 | -0.39782 | H                       | -5.25392 | 1.686759 | 0.767931 |
| H | 4.023687 | 2.751916 | 0.08776  | H                       | -4.50114 | -2.48405 | 0.047531 |
| H | 2.676491 | 1.839908 | 0.768458 | H                       | -1.38033 | 1.898242 | -2.34329 |
| H | 5.761929 | -2.05047 | -2.83567 | H                       | -1.76576 | 2.691509 | 0.548827 |
| H | 6.57763  | -0.78848 | -1.87491 | H                       | -3.44234 | 3.209739 | 0.853722 |
| H | 6.378818 | -0.59797 | -3.62653 | H                       | -2.81201 | 3.155831 | -0.80076 |
| H | -5.25164 | 1.331678 | -0.23108 | H                       | 1.390387 | 1.857546 | -2.3892  |
| H | -2.97037 | 1.433915 | -2.86507 | H                       | -1.34328 | -2.04244 | -1.63039 |
| H | -4.10563 | 0.35961  | -2.03031 | H                       | -2.48226 | -3.21338 | -0.91104 |
| H | -2.3658  | 0.15235  | -1.80207 | H                       | -1.19036 | -2.48766 | 0.076481 |
| H | -3.42185 | 4.30557  | 2.285194 | H                       | -6.97287 | 0.105332 | 1.269353 |
| H | -0.13623 | 3.798076 | 1.325055 | H                       | -6.50376 | -1.5891  | 1.542361 |
| H | -1.22632 | 5.085897 | 1.879925 | H                       | -7.0607  | -1.07236 | -0.05662 |
| H | -0.68283 | 5.052837 | 0.193394 | H                       | 5.090097 | 1.684594 | 1.150536 |
| H | -6.39014 | 2.055775 | 1.791129 | H                       | 2.444194 | 3.138138 | -0.37115 |
| H | -6.33364 | 3.81483  | 1.593488 | H                       | 3.212781 | 3.119299 | 1.229797 |
| H | -5.54401 | 3.070506 | 2.989061 | H                       | 1.585884 | 2.424595 | 1.004192 |

|   |          |          |          |
|---|----------|----------|----------|
| H | 4.705031 | -2.35773 | -0.26848 |
| H | 1.363105 | -2.55129 | -0.46331 |
| H | 2.764842 | -3.06853 | -1.43088 |
| H | 1.619539 | -1.85474 | -2.06408 |
| H | 6.801091 | -0.00438 | 1.715099 |
| H | 7.188708 | -0.44468 | 0.04252  |
| H | 6.626852 | -1.69072 | 1.170638 |

**NHC-CO (T)**

E = -1037.933045

|   |          |          |          |
|---|----------|----------|----------|
| O | 0.771255 | -0.94511 | -2.16731 |
| N | -1.15193 | 0.358328 | 0.653916 |
| N | 1.075856 | 0.372821 | 0.65353  |
| C | -3.05265 | -1.15436 | 0.373094 |
| C | -2.51183 | 0.139684 | 0.273201 |
| C | -0.10531 | -0.5841  | -1.38262 |
| C | -0.04265 | -0.01614 | -0.11298 |
| C | -4.3927  | -1.33108 | 0.014913 |
| C | -4.60727 | 1.004654 | -0.52474 |
| C | -3.26854 | 1.231183 | -0.1855  |
| C | -5.18785 | -0.26582 | -0.42867 |
| C | -0.72599 | 0.984717 | 1.816267 |
| C | 2.440878 | 0.15279  | 0.301544 |
| C | 3.233084 | 1.25629  | -0.06333 |
| C | 2.953941 | -1.15673 | 0.324469 |
| C | -2.20685 | -2.30995 | 0.830843 |
| C | 0.636578 | 0.994477 | 1.817798 |
| C | -2.64065 | 2.590761 | -0.34562 |
| C | -6.63867 | -0.48146 | -0.77711 |
| C | 5.126762 | -0.26297 | -0.36296 |
| C | 4.298813 | -1.33701 | -0.01331 |
| C | 2.07914  | -2.3272  | 0.678844 |
| C | 4.574511 | 1.023834 | -0.38404 |
| C | 2.641976 | 2.639092 | -0.15153 |
| C | 6.580881 | -0.4854  | -0.69267 |
| H | -4.82658 | -2.33157 | 0.084166 |
| H | -5.20616 | 1.841625 | -0.89188 |
| H | -1.43354 | 1.339867 | 2.554407 |
| H | -1.44753 | -2.55259 | 0.070663 |
| H | -2.82224 | -3.20096 | 1.006249 |
| H | -1.66473 | -2.07075 | 1.757261 |
| H | 1.335813 | 1.355277 | 2.561852 |
| H | -2.3687  | 3.037684 | 0.622864 |
| H | -3.32894 | 3.278143 | -0.85278 |

|   |          |          |          |
|---|----------|----------|----------|
| H | -1.7156  | 2.525749 | -0.93692 |
| H | -6.79727 | -1.46383 | -1.24293 |
| H | -7.00361 | 0.290106 | -1.46819 |
| H | -7.27054 | -0.44201 | 0.124675 |
| H | 4.709801 | -2.34941 | -0.00366 |
| H | 1.446755 | -2.10977 | 1.551294 |
| H | 2.686324 | -3.21401 | 0.899561 |
| H | 1.407156 | -2.57043 | -0.1583  |
| H | 5.198646 | 1.870403 | -0.68047 |
| H | 1.708516 | 2.630914 | -0.7325  |
| H | 3.345134 | 3.328847 | -0.63463 |
| H | 2.395513 | 3.050133 | 0.839543 |
| H | 6.736498 | -1.45617 | -1.18284 |
| H | 7.198427 | -0.47672 | 0.219923 |
| H | 6.965652 | 0.300695 | -1.35635 |

**NHC-CO<sup>+</sup> (D)**

E = -1037.743424

|   |          |          |          |
|---|----------|----------|----------|
| O | -0.72678 | -0.87717 | -2.09558 |
| N | 1.136931 | 0.354392 | 0.71836  |
| N | -1.06381 | 0.347955 | 0.72307  |
| C | 3.268888 | 1.244799 | -0.08342 |
| C | 2.501219 | 0.128966 | 0.293548 |
| C | 0.114362 | -0.40477 | -1.39702 |
| C | 0.040405 | 0.015926 | -0.01334 |
| C | 4.582757 | 0.999451 | -0.48943 |
| C | 4.311788 | -1.36931 | -0.13237 |
| C | 2.986449 | -1.18938 | 0.276268 |
| C | 5.12486  | -0.29443 | -0.51581 |
| C | 0.730113 | 0.891737 | 1.913928 |
| C | -2.43795 | 0.147005 | 0.319216 |
| C | -2.97313 | -1.1481  | 0.406442 |
| C | -3.1597  | 1.257564 | -0.1487  |
| C | 2.699379 | 2.639379 | -0.0867  |
| C | -0.64853 | 0.901724 | 1.910645 |
| C | 2.133886 | -2.36716 | 0.672714 |
| C | 6.554212 | -0.51807 | -0.92682 |
| C | -5.07754 | -0.23499 | -0.45212 |
| C | -4.48517 | 1.033613 | -0.53141 |
| C | -2.53255 | 2.62249  | -0.26309 |
| C | -4.30576 | -1.30768 | 0.015925 |
| C | -2.15372 | -2.31838 | 0.881436 |
| C | -6.51634 | -0.43612 | -0.84201 |
| H | 5.198424 | 1.844077 | -0.8044  |

|                        |          |          |          |                        |          |          |          |
|------------------------|----------|----------|----------|------------------------|----------|----------|----------|
| H                      | 4.719497 | -2.3817  | -0.15134 | C                      | 4.369214 | -1.2207  | -0.58654 |
| H                      | 1.442272 | 1.199427 | 2.669672 | C                      | 2.2415   | -2.51784 | -0.12255 |
| H                      | 1.727771 | 2.681435 | -0.60096 | C                      | 4.461579 | 1.170746 | -0.33466 |
| H                      | 3.379407 | 3.328626 | -0.59981 | C                      | 2.432334 | 2.50256  | 0.394566 |
| H                      | 2.54856  | 3.026826 | 0.93231  | C                      | 6.55257  | -0.04282 | -1.07848 |
| H                      | -1.35962 | 1.238789 | 2.655655 | H                      | -5.01251 | -2.11152 | -0.4101  |
| H                      | 1.50776  | -2.15317 | 1.550472 | H                      | -4.84839 | 2.164583 | -0.85806 |
| H                      | 2.764252 | -3.23103 | 0.913189 | H                      | -1.39627 | 0.011009 | 2.750276 |
| H                      | 1.464668 | -2.67415 | -0.14625 | H                      | -1.53143 | -2.62121 | -0.22452 |
| H                      | 6.867488 | 0.200133 | -1.69558 | H                      | -3.09959 | -3.35428 | 0.213305 |
| H                      | 6.708423 | -1.53344 | -1.31283 | H                      | -2.1011  | -2.54309 | 1.443496 |
| H                      | 7.226548 | -0.38707 | -0.06434 | H                      | 1.39628  | -0.01068 | 2.750269 |
| H                      | -5.06882 | 1.874445 | -0.91076 | H                      | -1.82679 | 2.693586 | 0.880819 |
| H                      | -2.30409 | 3.056696 | 0.722026 | H                      | -2.8686  | 3.376142 | -0.39428 |
| H                      | -3.21036 | 3.313668 | -0.77635 | H                      | -1.38606 | 2.469811 | -0.81313 |
| H                      | -1.59179 | 2.592871 | -0.83338 | H                      | -6.84536 | -0.90816 | -1.54397 |
| H                      | -4.75207 | -2.30205 | 0.076046 | H                      | -6.75911 | 0.852885 | -1.79125 |
| H                      | -1.43882 | -2.64262 | 0.109534 | H                      | -7.20939 | 0.197929 | -0.20754 |
| H                      | -2.80009 | -3.17425 | 1.106478 | H                      | 4.848493 | -2.16467 | -0.85761 |
| H                      | -1.57951 | -2.08286 | 1.789172 | H                      | 1.827069 | -2.69354 | 0.881405 |
| H                      | -6.82376 | 0.271463 | -1.62255 | H                      | 2.868707 | -3.3762  | -0.39378 |
| H                      | -7.17539 | -0.2745  | 0.025514 | H                      | 1.386061 | -2.46997 | -0.81251 |
| H                      | -6.69598 | -1.45632 | -1.20421 | H                      | 5.012421 | 2.11153  | -0.4105  |
|                        |          |          |          | H                      | 1.53128  | 2.62109  | -0.22501 |
|                        |          |          |          | H                      | 3.099422 | 3.354336 | 0.212588 |
|                        |          |          |          | H                      | 2.101023 | 2.543368 | 1.442996 |
|                        |          |          |          | H                      | 6.758762 | -0.85202 | -1.79242 |
|                        |          |          |          | H                      | 7.209311 | -0.1996  | -0.20775 |
|                        |          |          |          | H                      | 6.845792 | 0.908629 | -1.54256 |
| <b>NHC (S)</b>         |          |          |          | <b>NHC+ (D)</b>        |          |          |          |
| <b>E = -924.583095</b> |          |          |          | <b>E = -924.320966</b> |          |          |          |
| N                      | -1.0631  | 0.007142 | 0.593044 | N                      | -1.09641 | -0.44775 | 0.490503 |
| N                      | 1.063095 | -0.00712 | 0.593038 | N                      | 1.074796 | -0.46105 | 0.548228 |
| C                      | -3.12433 | -1.20306 | 0.079158 | C                      | -3.42657 | -1.11548 | 0.062842 |
| C                      | -2.43133 | 0.014279 | 0.160559 | C                      | -2.43682 | -0.11609 | 0.140485 |
| C                      | -6E-06   | -0.0001  | -0.27884 | C                      | 0.035559 | -0.03214 | -0.17192 |
| C                      | -4.46163 | -1.17074 | -0.33444 | C                      | -4.71226 | -0.70373 | -0.29673 |
| C                      | -4.36916 | 1.220653 | -0.58679 | C                      | -4.0073  | 1.590653 | -0.54407 |
| C                      | -3.03084 | 1.237492 | -0.17682 | C                      | -2.70939 | 1.244361 | -0.16858 |
| C                      | -5.10233 | 0.029705 | -0.66517 | C                      | -5.03169 | 0.638295 | -0.59133 |
| C                      | -0.6805  | 0.004788 | 1.936643 | C                      | -0.71479 | -1.22531 | 1.590136 |
| C                      | 2.431328 | -0.01426 | 0.160551 | C                      | 2.439011 | -0.16313 | 0.162561 |
| C                      | 3.124268 | 1.203087 | 0.078915 | C                      | 3.002931 | 1.050802 | 0.593124 |
| C                      | 3.030903 | -1.23752 | -0.17658 |                        |          |          |          |
| C                      | -2.43245 | -2.5025  | 0.39507  |                        |          |          |          |
| C                      | 0.6805   | -0.00459 | 1.936639 |                        |          |          |          |
| C                      | -2.24139 | 2.517785 | -0.12305 |                        |          |          |          |
| C                      | -6.55257 | 0.042749 | -1.0785  |                        |          |          |          |
| C                      | 5.10234  | -0.02973 | -0.66514 |                        |          |          |          |

|   |          |          |          |                                                    |           |           |           |
|---|----------|----------|----------|----------------------------------------------------|-----------|-----------|-----------|
| C | 3.13042  | -1.1006  | -0.62698 |                                                    |           |           |           |
| C | -3.14608 | -2.57904 | 0.287129 | <b>C<sub>2</sub>O<sub>2</sub><sup>+</sup> (D)</b>  |           |           |           |
| C | 0.648623 | -1.22749 | 1.633319 | <b>E= -226.320985</b>                              |           |           |           |
| C | -1.61466 | 2.254679 | -0.10969 | C                                                  | -0.168234 | 0.698563  | 0         |
| C | -6.43762 | 1.020356 | -0.94684 | C                                                  | 0.168234  | -0.698563 | 0         |
| C | 5.063031 | 0.402295 | -0.56117 | O                                                  | -0.168234 | -1.795423 | 0         |
| C | 4.446467 | -0.79235 | -0.97395 | O                                                  | 0.168234  | 1.795423  | 0         |
| C | 2.473094 | -2.37482 | -1.08309 |                                                    |           |           |           |
| C | 4.324302 | 1.306915 | 0.217488 | <b>C<sub>2</sub>O<sub>2</sub><sup>2+</sup> (S)</b> |           |           |           |
| C | 2.219375 | 2.043123 | 1.410591 | <b>E= -225.669322</b>                              |           |           |           |
| C | 6.489623 | 0.690865 | -0.93113 | C                                                  | 0         | 0         | 0.723611  |
| H | -5.49371 | -1.46147 | -0.38348 | C                                                  | 0         | 0         | -0.723611 |
| H | -4.22583 | 2.630794 | -0.79052 | O                                                  | 0         | 0         | -1.84367  |
| H | -1.44146 | -1.68335 | 2.247175 | O                                                  | 0         | 0         | 1.84367   |
| H | -2.14113 | -2.86478 | -0.05009 |                                                    |           |           |           |
| H | -3.87455 | -3.18756 | -0.26189 | <b>C<sub>2</sub>O<sub>2</sub> (T)</b>              |           |           |           |
| H | -3.23354 | -2.85669 | 1.348719 | <b>E= -226.675403</b>                              |           |           |           |
| H | 1.343304 | -1.72011 | 2.303443 | C                                                  | 0         | 0         | 0.645944  |
| H | -1.28083 | 2.443472 | 0.922275 | C                                                  | 0         | 0         | -0.645944 |
| H | -1.90075 | 3.202583 | -0.57883 | O                                                  | 0         | 0         | -1.843436 |
| H | -0.71238 | 1.84624  | -0.63645 | O                                                  | 0         | 0         | 1.843436  |
| H | -6.8615  | 0.326084 | -1.68668 |                                                    |           |           |           |
| H | -6.4935  | 2.039136 | -1.34785 | <b>CO (S)</b>                                      |           |           |           |
| H | -7.08725 | 0.970341 | -0.05832 | <b>E= -113.359803</b>                              |           |           |           |
| H | 5.008579 | -1.4997  | -1.58661 | C                                                  | 0         | 0         | -0.649693 |
| H | 2.151137 | -2.99437 | -0.23219 | O                                                  | 0         | 0         | 0.48727   |
| H | 3.163701 | -2.97204 | -1.68891 |                                                    |           |           |           |
| H | 1.578787 | -2.16687 | -1.68894 | <b>CO (T)</b>                                      |           |           |           |
| H | 4.791387 | 2.239335 | 0.539804 | <b>E= -113.1495591</b>                             |           |           |           |
| H | 1.47066  | 2.561033 | 0.792117 | C                                                  | 0.0       | 0.0       | -0.693926 |
| H | 2.884012 | 2.805299 | 1.833146 | O                                                  | 0.0       | 0.0       | 0.520445  |
| H | 1.682229 | 1.561939 | 2.240128 | <b>CO<sup>+</sup> (D)</b>                          |           |           |           |
| H | 6.72068  | 0.338034 | -1.94519 | <b>E= -112.845786</b>                              |           |           |           |
| H | 7.176077 | 0.168512 | -0.24491 | C                                                  | 0         | 0         | -0.641584 |
| H | 6.715707 | 1.762565 | -0.87022 | O                                                  | 0         | 0         | 0.481188  |
